# Supplementary material for: A Novel Method for Sea Surface Temperature Prediction using a Featural Granularity-Based ConvLSTM Model of Data-Knowledge-Driven
Source: Copernicus journal article supplement (doi:10.5194/egusphere-2025-239), 2025-05-21
Supplement: Supplementary file [file egusphere-2025-239-CC4-supplement.pdf]

Dear Dr. Añel,

Thank you profoundly for your rigorous review and for guiding us toward full compliance with the journal's policies; we deeply apologize for any concerns caused and are truly grateful for your dedication to transparent scholarship.

We immediately downloaded the original Zenodo attachment (<https://doi.org/10.5281/zenodo.14759549>) and verified that it contains code files when accessed via our database interface, as shown in the screenshot fig. 1. To ensure universal accessibility, we proactively uploaded a new ZIP-format code package (<https://doi.org/10.5281/zenodo.15714288>) with identical content and will update the manuscript to prioritize this direct-access option.

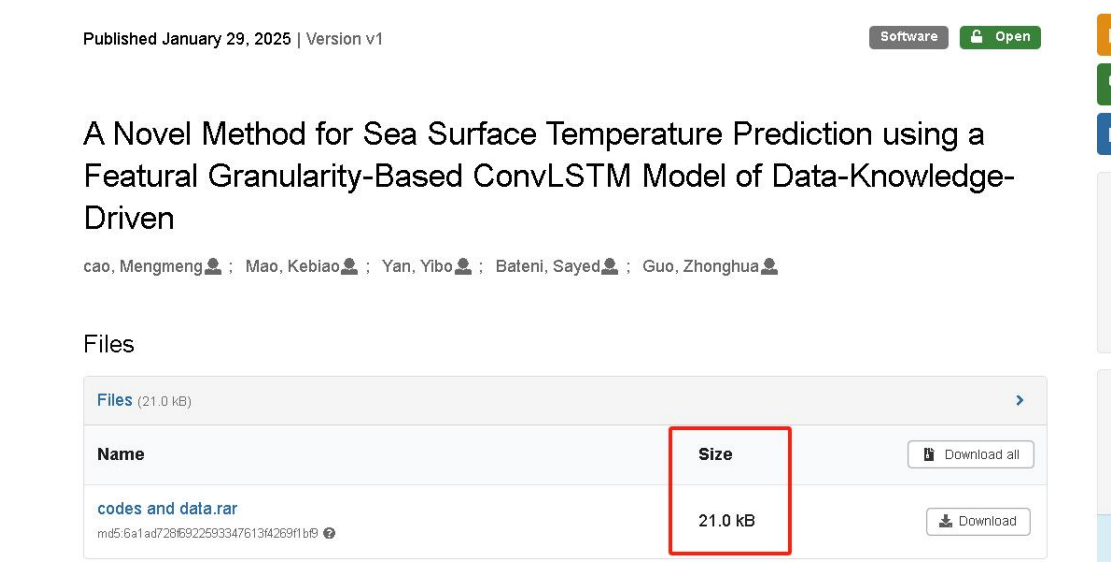

Fig.1 Original Zenodo file opened via database interface, showing active code files

Regarding data availability, we have transferred all public dataset links (originally in Section 3.1) into the "Code and Data Availability" section, adding explicit URLs for all datasets used. The revised section now states:

**Code and Data availability:** The codes for conducting the analyses can be downloaded from <https://zenodo.org/records/15714288>. The data on which this article is based are available in <https://cds.climate.copernicus.eu/datasets/reanalysis-era5-single-levels-monthly-means?tab=overview> (previous interface: <https://cds.climate.copernicus.eu/cdsapp#!/dataset/reanalysis-era5-single-levels->

monthly-means) and <https://cds.climate.copernicus.eu/datasets/projections-cmip5-monthly-single-levels?tab=overview> (previous interface: <https://cds.climate.copernicus.eu/cdsapp#!/dataset/projections-cmip5-monthly-single-levels>).

Your expertise has been invaluable in improving this work. We are committed to upholding GMD's policies rigorously and appreciate your guidance. Should further refinements be needed, we will address them immediately.

With utmost respect and appreciation,

Mengmeng Cao
